# Supplementary material for: Longitudinal changes in neurodevelopmental outcomes between 18 and 36 months in children with prenatal triptan exposure: findings from the Norwegian Mother and Child Cohort Study
Source: PubMed Central journal article supplement — BMJ Open. 2016 Sep 13;6(9):e011971. doi: 10.1136/bmjopen-2016-011971 (PMC5030558; doi:10.1136/bmjopen-2016-011971), 2016-09-13

Supplementary Figures

Supplemental Figure 1. Changes between 18 and 36 months for internalizing-type behaviors. Key: CBCL: Child Behavior Checklist; EAS: Emotionality, Activity, and Shyness Questionnaire

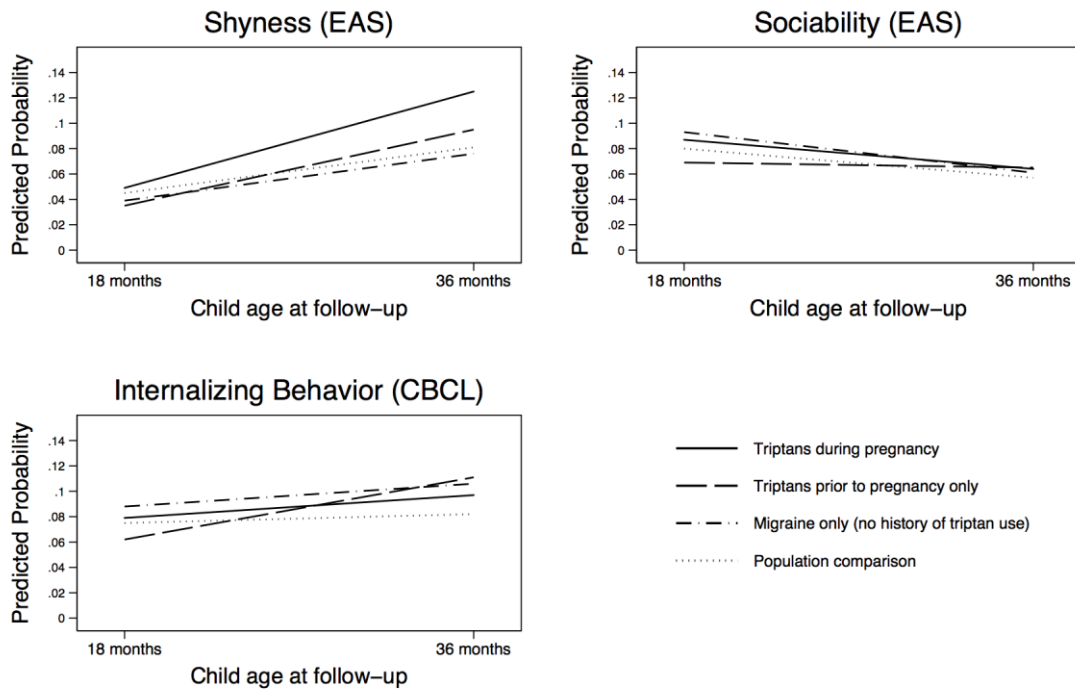

Supplemental Figure 2. Changes between 18 and 36 months for motor skills and communication.

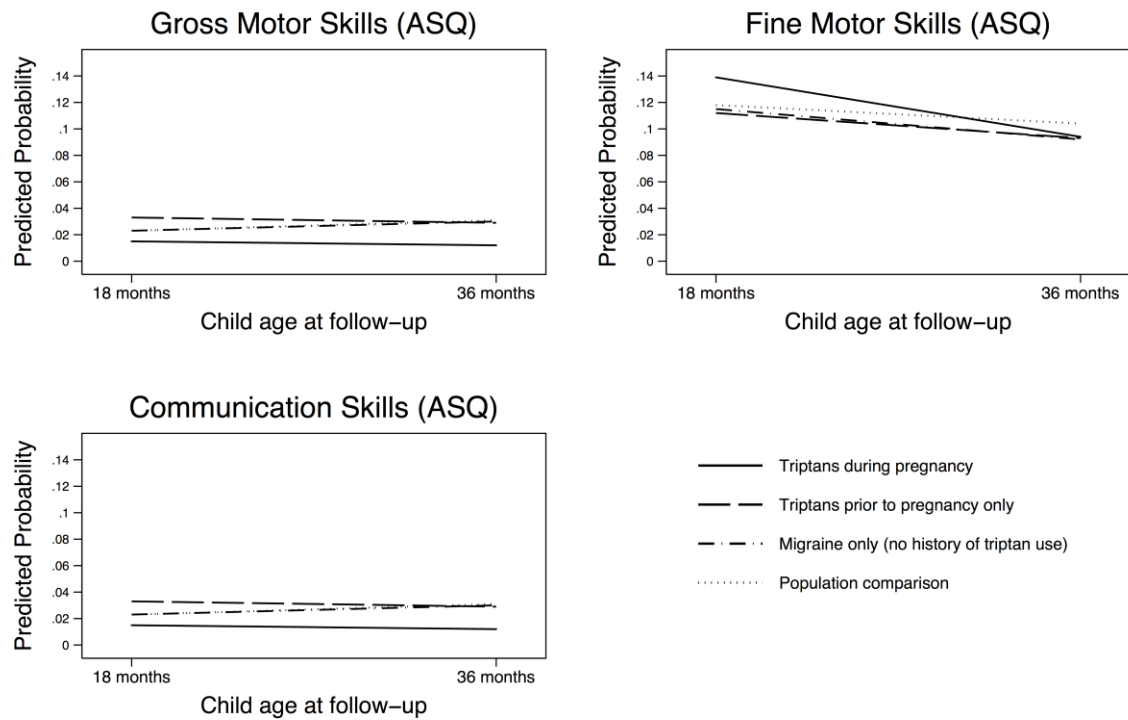

Supplement: bmjopen-2016-011971supp_figures.pdf [file bmjopen-2016-011971supp_figures.pdf]
